# Supplementary material
Source: PubMed Central journal article supplement (PMC1182243)
Supplement: 7600748s4.pdf [file 7600748s4.pdf]

Total No. of genes upregulated 2-fold or more 479 (568)

Up-regulated genes in Biological Process (293)

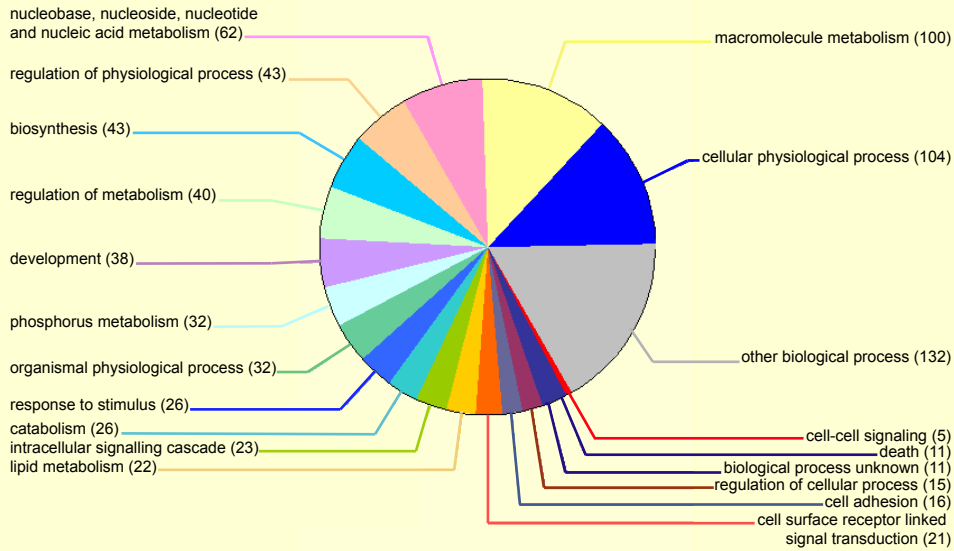

Total No. of genes down regulated 2-fold or more 775 (965)

Down-regulated genes in Biological Process (483)

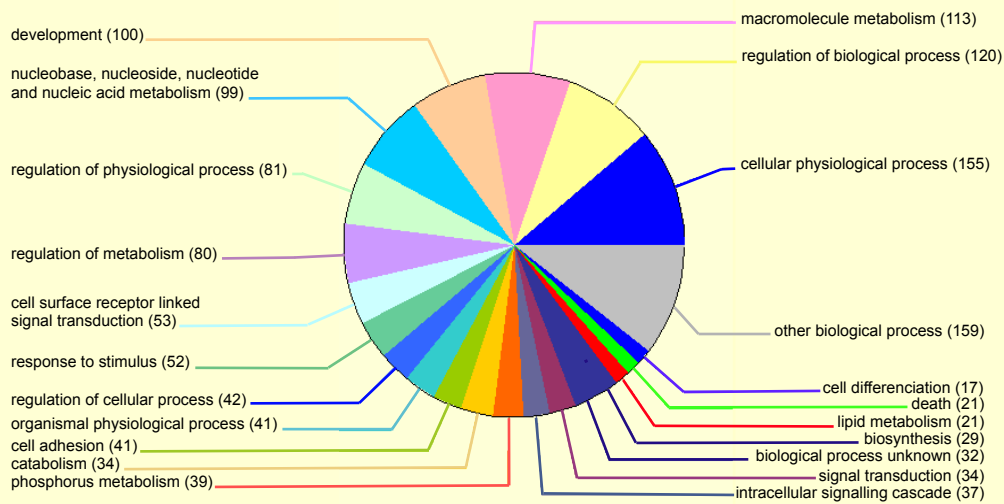

Mengus et al., Supplemental Fig. 4
