# Supplementary material
Source: PubMed Central journal article supplement (PMC1182243)

**Growth in 10% serum**

**Clone 1 *taf4<sup>lox/-</sup>***

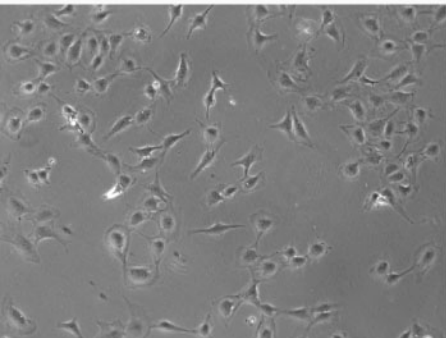

**Clone 3 *taf4<sup>-/-</sup>***

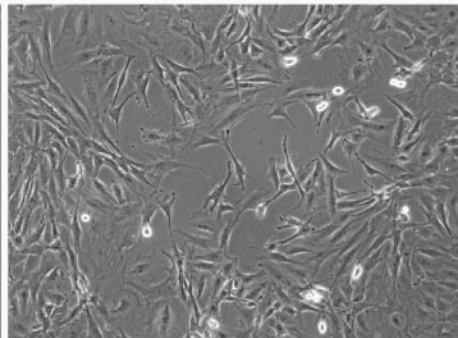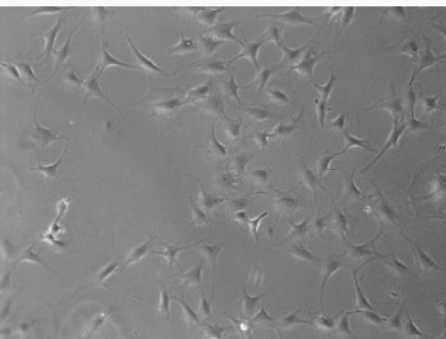

**Clone 2 *taf4<sup>lox/-</sup>***

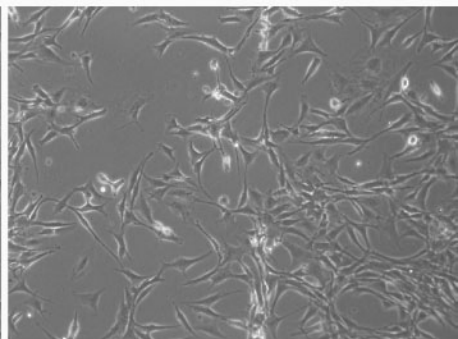

**Clone 4 *taf4<sup>-/-</sup>***

Supplement: 7600748s1.pdf [file 7600748s1.pdf]

Growth in 1% serum

Clone 1 *taf4<sup>lox/-</sup>*

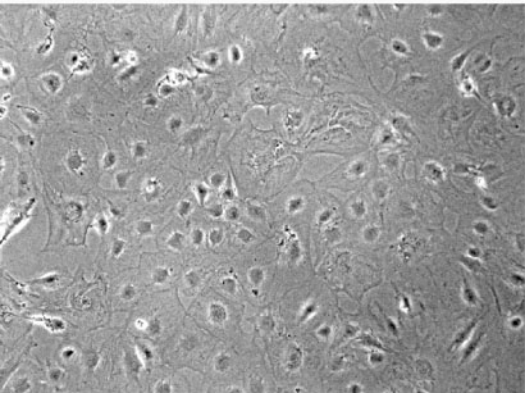

Clone 3 *taf4<sup>-/-</sup>*

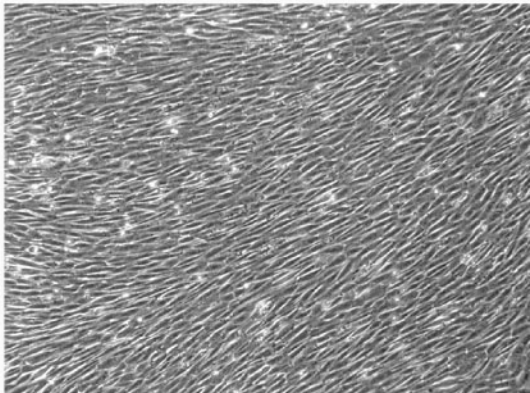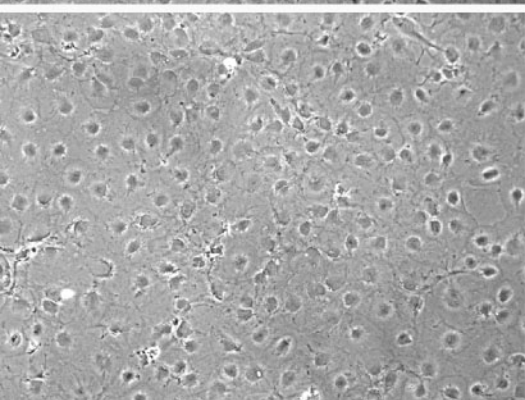

Clone 2 *taf4<sup>lox/-</sup>*

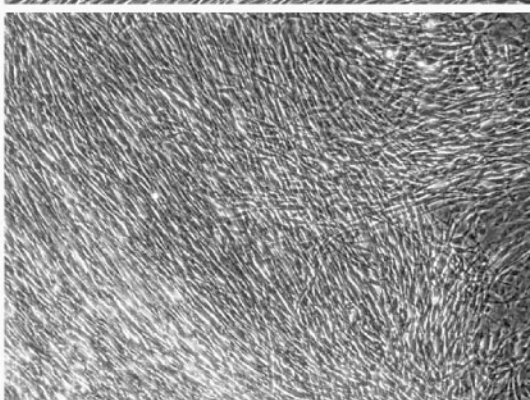

Clone 4 *taf4<sup>-/-</sup>*

Supplement: 7600748s2.pdf [file 7600748s2.pdf]
